# Supplementary material for: Facultative Parthenogenesis in California Condors
Source: Oxford University Press journal article supplement (doi:10.1093/jhered/esab052), 2021-09-17
Supplement: esab052_suppl_supplementary_table_1.docx [file esab052_suppl_supplementary_table_1.docx]

Supplementary Table 1

Genotyping at 21 microsatellite loci for parthenotes, their dams and co-housed males that were putative sires. Data from Moran, et al., 2021).

| msat | "sire" | dam | parth | "sire" | dam | parth |
| --- | --- | --- | --- | --- | --- | --- |
| locus | SB6 | SB35 | SB260 | SB42 | SB39 | SB517 |
| 109D | 194/218 | 194/222 | 194/194 | 194/218 | 194/222 | 222/222 |
| 125G | 187/187 | 181/187 | 181/181 | 179/187 | 187/187 | 187/187 |
| 156A | 212/212 | 212/212 | 212/212 | 212/220 | 212/212 | 212/212 |
| 100A | 222/230 | 222/230 | 222/222 | 222/230 | 222/224 | 222/222 |
| 133H | 235/239 | 235/239 | 235/235 | 219/235 | 231/235 | 231/231 |
| 144A | 207/221 | 207/209 | 209/209 | 209/221 | 207/221 | 207/207 |
| 151F | 151/163 | 151/160 | 160/160 | 151/169 | 157/160 | 157/157 |
| H3 | 121/121 | 121/129 | 129/129 | 121/121 | 121/129 | 121/121 |
| A8 | 227/229 | 215/227 | 215/215 | 229/229 | 213/227 | 227/227 |
| D6 | 258/266 | 258/258 | 258/258 | 258/258 | 258/258 | 258/258 |
| H115 | 199/211 | 199/199 | 199/199 | 199/211 | 199/199 | 199/199 |
| D126 | 230/230 | 230/230 | 230/230 | 230/230 | 230/230 | 230/230 |
| D24 | 166/166 | 170/170 | 170/170 | 166/170 | 166/170 | 170/170 |
| H269 | 218/226 | 218/218 | 218/218 | 218/226 | 218/218 | 218/218 |
| H238 | 131/131 | 131/131 | 131/131 | 131/131 | 131/131 | 131/131 |
| C5 | 180/186 | 180/192 | 180/180 | 180/180 | 192/192 | 192/192 |
| H106 | 241/241 | 217/241 | 217/217 | 217/241 | 241/241 | 241/241 |
| H127 | 125/125 | 125/125 | 125/125 | 121/125 | 125/125 | 125/125 |
| A20 | 208/210 | 210/210 | 210/210 | 210/210 | 208/210 | 210/210 |
| G8 | 249/253 | 249/253 | 249/249 | 253/253 | 253/253 | 253/253 |
| H6 | 123/123 | 115/123 | 115/115 | 115/123 | 115/123 | 123/123 |
| D9 | 205/217 | 217/217 | 217/217 | 205/217 | 217/221 | 217/217 |
